# Supplementary material for: Characterization of Phosphorus Species in Human Dentin by Solid-State NMR
Source: MDPI journal article supplement (doi:10.3390/molecules25010196), 2020-01-03
Supplement: s1 [file s1]

## **Supplementary Information for**

### **Characterization of Phosphorus Species in Human Dentin by Solid-State NMR**

**Yi-Ling Tsai <sup>1</sup>, Meng-Wei Kao <sup>1</sup>, Shing-Jong Huang <sup>2</sup>, Yuan-Ling Lee <sup>3,\*</sup>, Chun-Pin Lin <sup>3,\*</sup> and Jerry Chun Chung Chan <sup>1,\*</sup>**

<sup>1</sup> Department of Chemistry, National Taiwan University, No. 1, Sec. 4, Roosevelt Road, Taipei, Taiwan

<sup>2</sup> Instrumentation Center, National Taiwan University, No. 1, Sec. 4, Roosevelt Road, Taipei, Taiwan

<sup>3</sup> School of Dentistry, National Taiwan University Hospital, National Taiwan University, No. 7, Chung San South Road, Taipei, Taiwan

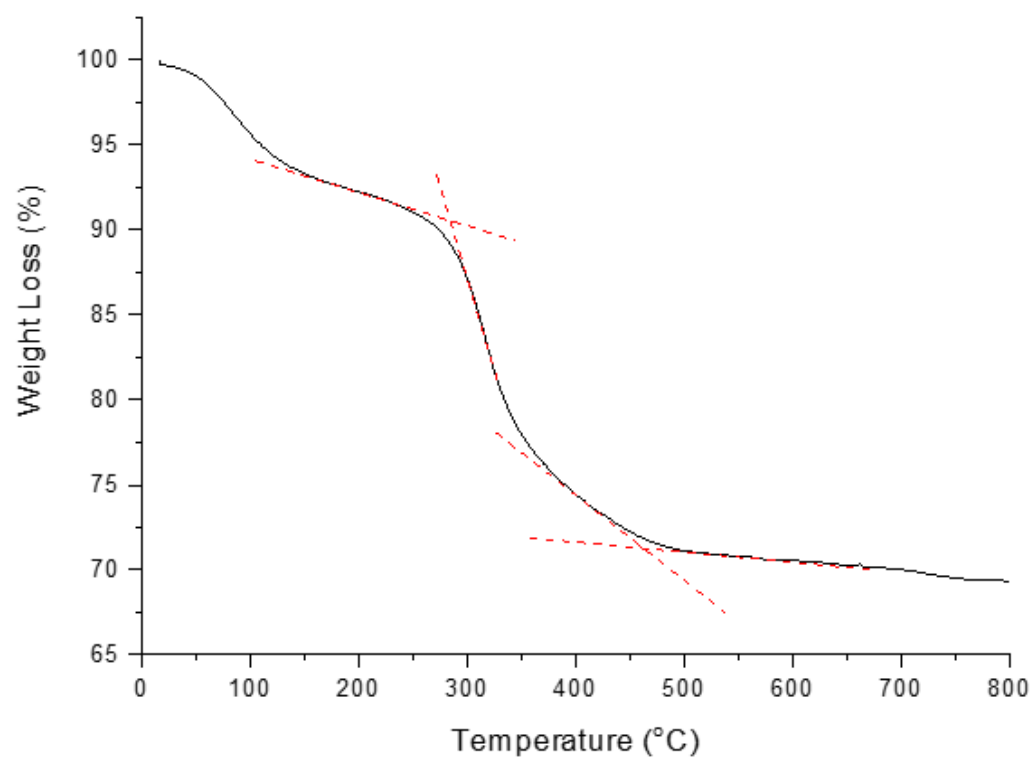

**Fig. S1.** Typical TGA profile obtained for human dentin samples. The weight loss attributed to the removal of organic matter was estimated by the vertical difference of the two cross points.

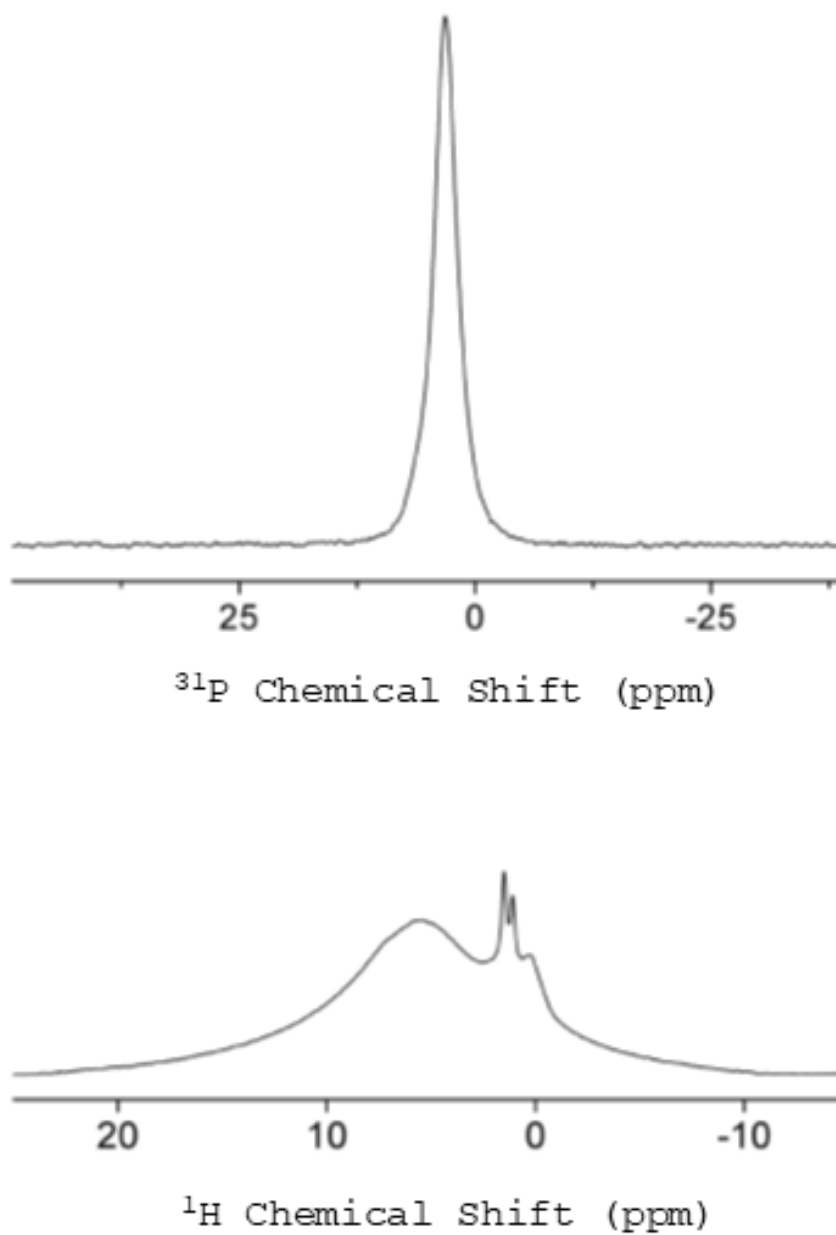

**Fig. S2.** Typical solid-state NMR spectra acquired under magic-angle conditions (MAS) for human dentin samples at a spinning frequency of 10 kHz.

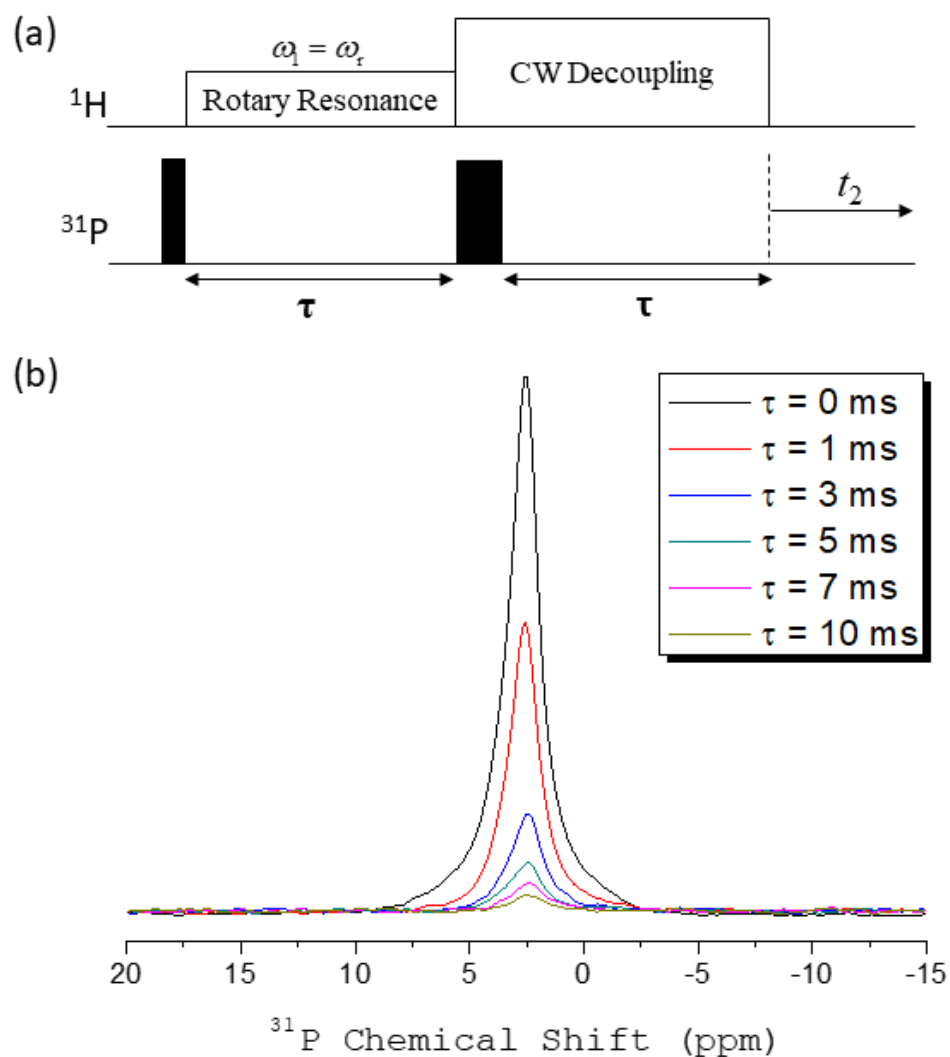

**Fig. S3. (a)** The pulse sequence of the dipolar dephasing experiment based on the rotary resonance technique. The  $^{31}\text{P}$   $\pi/2$  and  $\pi$  pulses were set to 5 and 10  $\mu\text{s}$  long, respectively.  $^1\text{H}$  decoupling at a field strength of 80 kHz was used. The recycle delay was set to 600 s. **(b)** The spectra acquired for HAp indicated that the signal of the orthophosphate group in close proximity of the hydroxyl group could be suppressed effectively when the dephasing period is  $\geq 10$  ms.

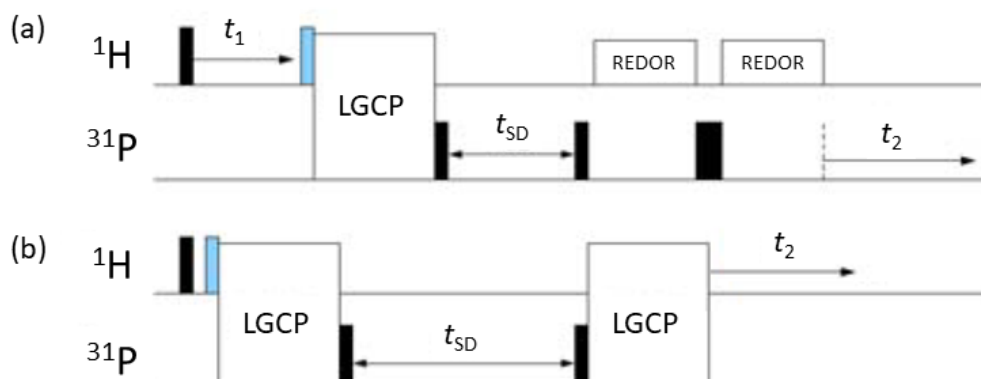

**Fig. S4.** Pulse sequences employed for the  $^{31}\text{P}$  spin diffusion experiments. The spinning frequency was set to 10 kHz. (a) the 2-D technique used to probe the spin diffusion between the phases of HAp and HDAP, and that between dentin-ACP and HDAP; (b) the 1-D technique used to probe the spin diffusion between HAp and dentin-ACP. For the Lee-Goldburg CP (LGCP) period, the  $^1\text{H}$  nutation frequency and the resonance offset were set equal to 50 and 35.35 kHz, respectively, to fulfill the LG irradiation condition and the  $^{31}\text{P}$  nutation frequency was ramped through the Hartmann-Hahn matching condition. The flip angle of the pulse right before the LGCP block was adjusted to 144.7 deg so that the spin-temperature inversion can be realized by phase alternating the first  $^1\text{H}$   $\pi/2$  pulse. The contact time of the LGCP period was set to 2.5 ms. The recycle delay was set to 2 s. For the REDOR block, the  $\pi$  pulse was set to 10  $\mu\text{s}$ . The total REDOR dephasing time was set to 2 ms.

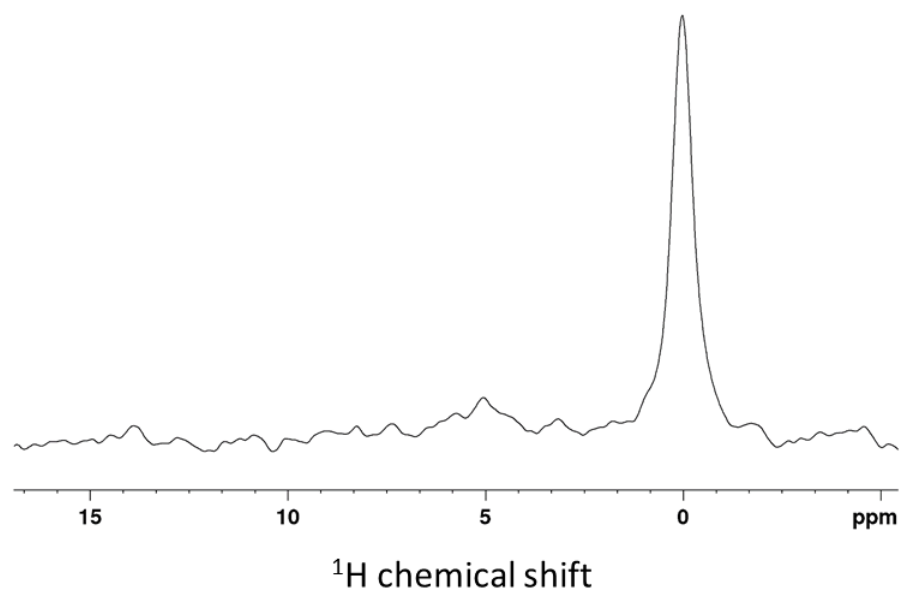

**Fig. S5.** Typical  $^1\text{H}$  spectrum acquired with the pulse sequence shown in **Fig. S4(b)**. The first LGCP contact time was set to 12 ms to enhance the initial HAp signal. The contact time for the second CP block was set to 2 ms. The  $t_{\text{SD}}$  was varied to probe the transfer between the HAp and dentin-ACP signals. The data are shown in **Figure 6(a)** of the main text.

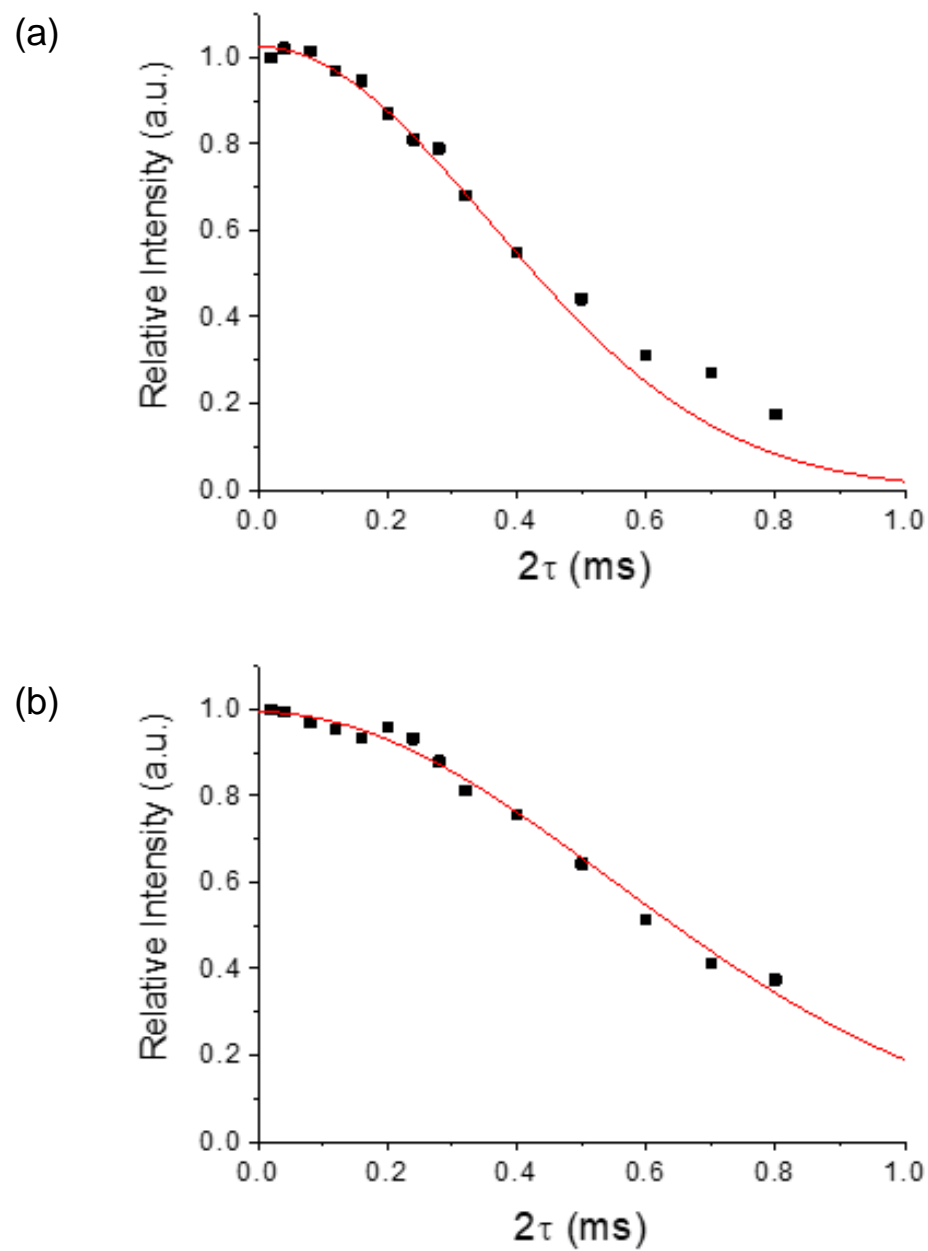

**Fig. S6.** Signal modulation of the spin-echo experiment as a function of the inter-pulse delay under static conditions. **(a)** HAp; **(b)** ACP. The data were fitted by a Gaussian decay, from which the  $M_2$  values were extracted.

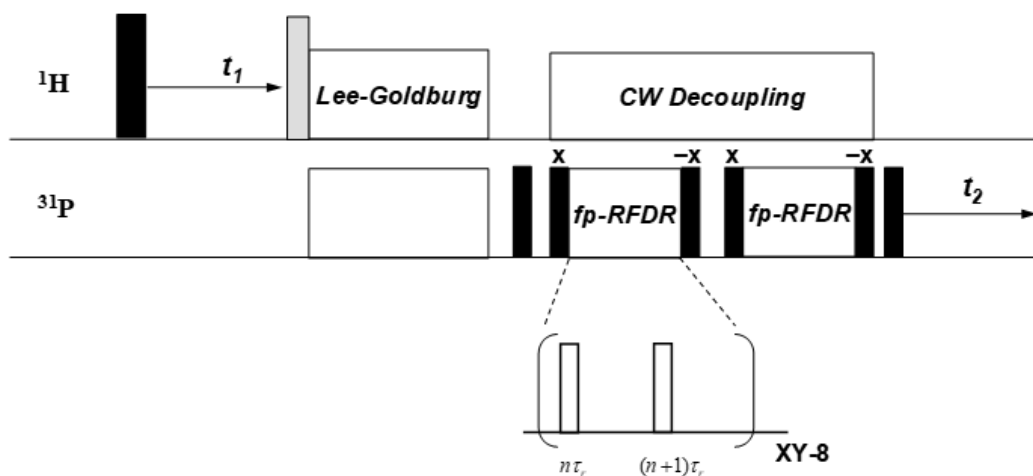

**Fig. S7.** Pulse sequence for the DQ-filtered HETCOR experiments. The flip angle of the pulse Lee-Goldburg condition during the CP contact time was set as described in the caption of Fig. S4. For the fp-RFDR period, the  $^{31}\text{P}$   $\pi$  pulses were set to 30  $\mu\text{s}$ . The  $\pi$  pulse trains were phase cycled according to the XY-8 scheme. The  $^{31}\text{P}$   $\pi/2$  pulses were set to 5  $\mu\text{s}$ . The DQ reconversion period (the first fp-RFDR block flanked by two  $\pi/2$  pulses) was set equal to the DQ excitation period. The  $^1\text{H}$  decoupling was set to 85 kHz during the DQ excitation/reconversion periods.



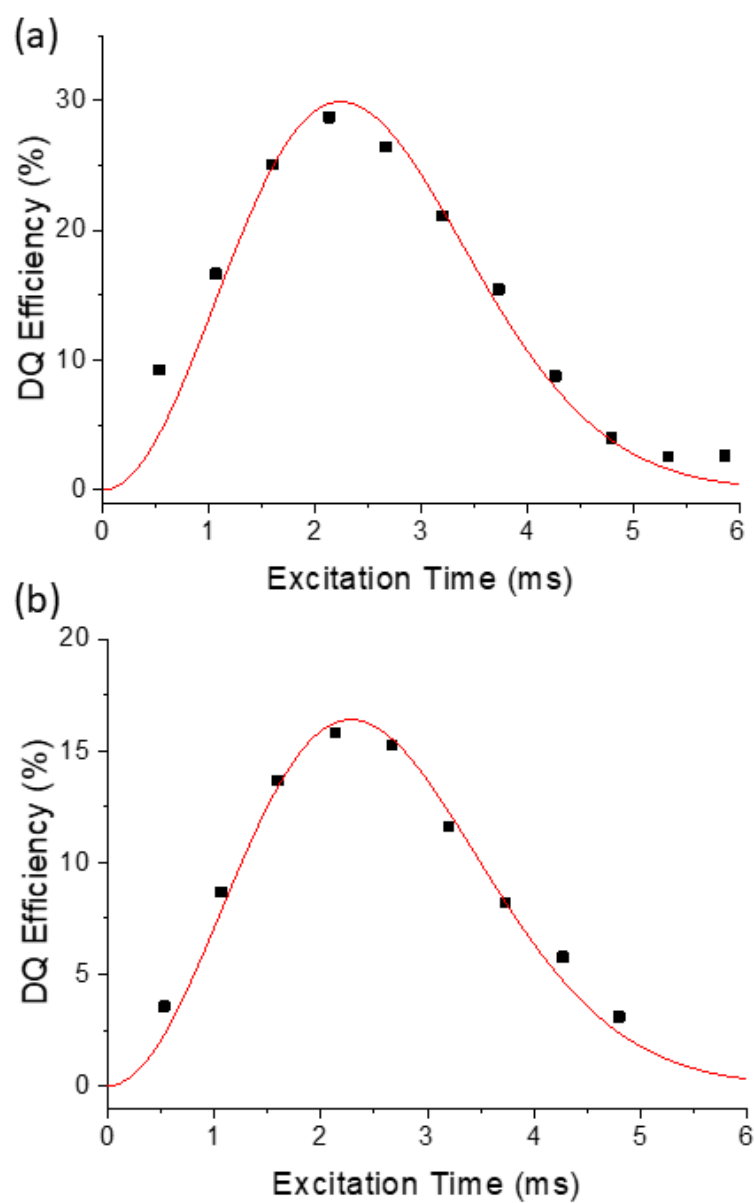

**Fig. S8.** Signal modulation of the DQ filtered HETCOR experiments as a function of the excitation time. (a) HAp; (b) ACP. The data were fitted by Eq. (3) of the main text.

**Table S1.** Summary of the NMR parameters extracted from the  $^{31}\text{P}\{^1\text{H}\}$  variable contact-time HETCOR measurements of the human dentin samples.

| Sample          |            | $M_0$ | $\tau_{\text{CP}}$<br>(ms) | $T_{1\rho}$<br>(ms) |
|-----------------|------------|-------|----------------------------|---------------------|
| R <sub>17</sub> | apatite    | 1.00  | $4.6 \pm 0.2$              | --                  |
|                 | dentin-ACP | 0.85  | $0.48 \pm 0.04$            | $26 \pm 9$          |
| R <sub>19</sub> | apatite    | 1.00  | $5.0 \pm 0.8$              | --                  |
|                 | dentin-ACP | 0.81  | $0.58 \pm 0.09$            | $17 \pm 4$          |
| R <sub>21</sub> | apatite    | 1.00  | $3.6 \pm 0.2$              | --                  |
|                 | dentin-ACP | 0.62  | 0.52                       | 10                  |
| R <sub>22</sub> | apatite    | 1.00  | $5.3 \pm 0.3$              | --                  |
|                 | dentin-ACP | 0.81  | 0.56                       | 20                  |
| R <sub>31</sub> | apatite    | 1.00  | $4.8 \pm 0.2$              | --                  |
|                 | dentin-ACP | 0.84  | 0.56                       | 18                  |
| R <sub>51</sub> | apatite    | 1.00  | $4.3 \pm 0.2$              | --                  |
|                 | dentin-ACP | 0.70  | $0.59 \pm 0.3$             | $16 \pm 2$          |
